# Supplementary material for: Influence of temperature, added electrolyte, and polymer molecular weight on the counterion-condensation phenomenon in aqueous solution of sodium polystyrenesulfonate: a scaling theory approach
Source: Royal Society of Chemistry journal article supplement (doi:10.1039/c5ra10933g), 2015-01-01
Supplement: c5ra10933g1.pdf [file c5ra10933g1.pdf]

Electronic Supplementary Information

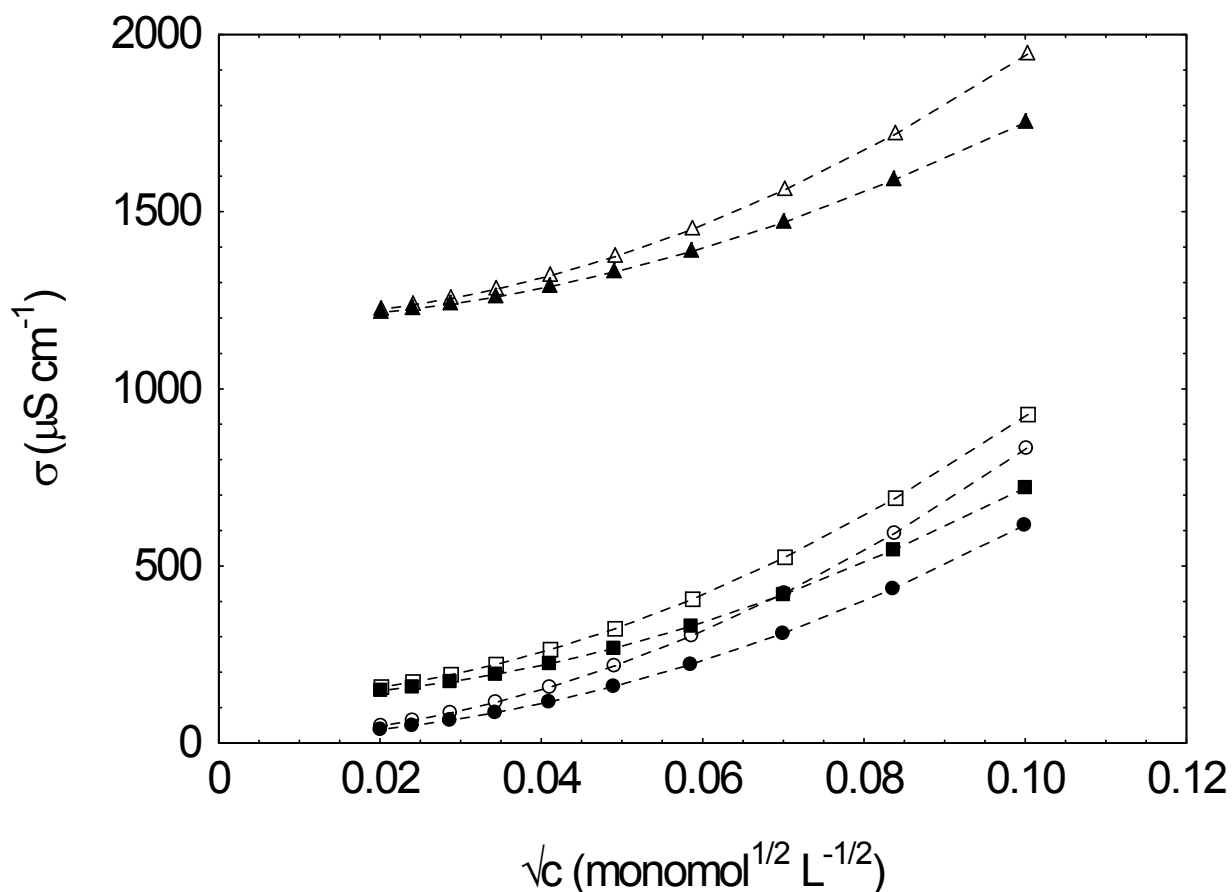

**Fig. 1S** Experimental specific conductivities ( $\kappa$ ) of NaPSS in the presence of varying concentrations of NaCl [0.0001 (circles), 0.0010 (squares), and 0.0100 (triangles) mol L<sup>-1</sup>] in water as a function of the square root of the polyelectrolyte concentration at 308.15 K. The open symbols refer to the NaPSS sample with a molecular weight of 70000 whereas the closed symbols to the NaPSS sample with a molecular weight of 1000000.

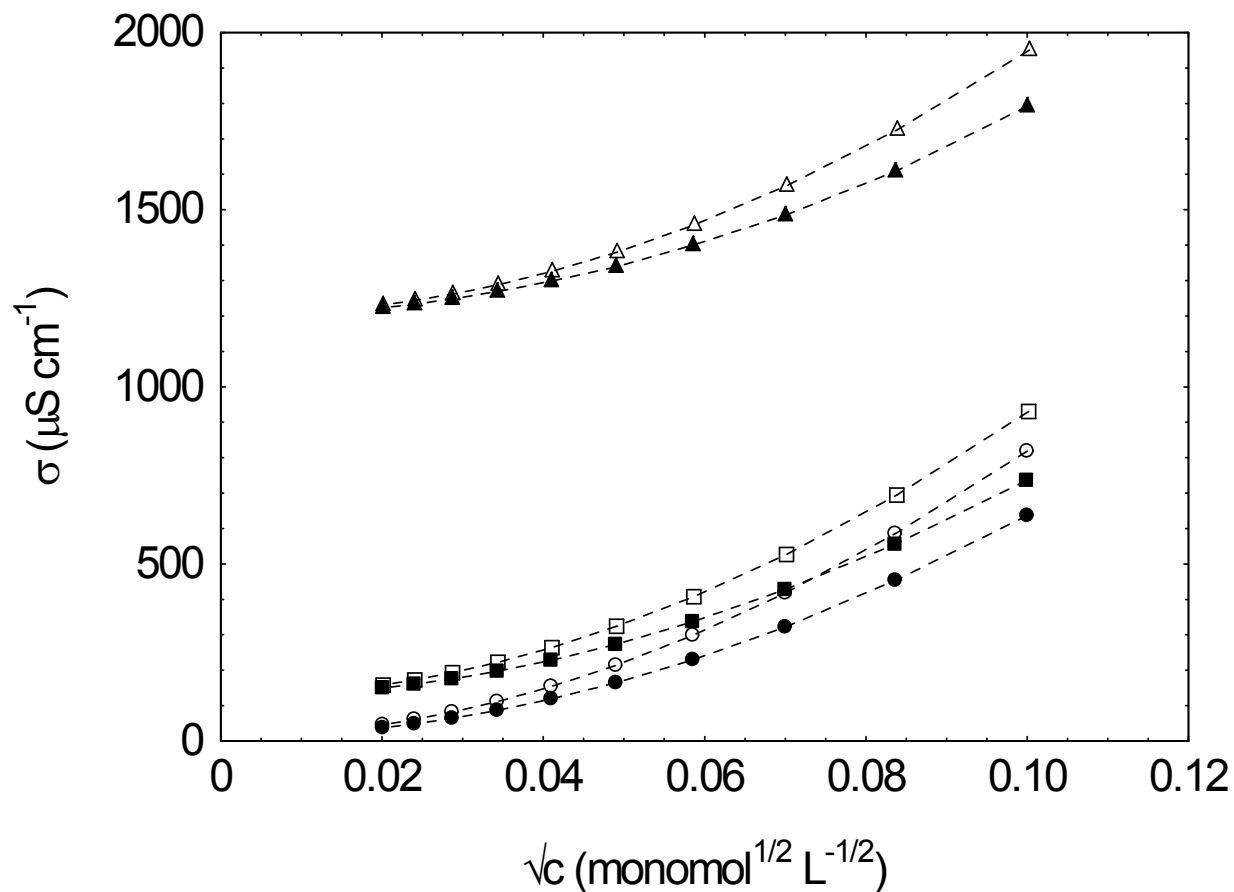

**Fig. 2S** Experimental specific conductivities ( $\kappa$ ) of NaPSS in the presence of varying concentrations of NaCl [0.0001 (circles), 0.0010 (squares), and 0.0100 (triangles) mol L<sup>-1</sup>] in water as a function of the square root of the polyelectrolyte concentration at 318.15 K. The open symbols refer to the NaPSS sample with a molecular weight of 70000 whereas the closed symbols to the NaPSS sample with a molecular weight of 1000000.
